# Supplementary material for: Comparative Transcriptome Profiling of Cassava Tuberous Roots in Response to Postharvest Physiological Deterioration
Source: MDPI journal article supplement (doi:10.3390/ijms24010246), 2022-12-23
Supplement: s1 [file s1]

Table S2 GO enrichment analysis of upregulated and downregulated co-DEGs

| Biological process GO terms |                                              |                      |                        |           |                       | Cellular components                               |                  |                      |                        |           |                                                   | Molecular functions           |                  |                      |                         |           |                       |
|-----------------------------|----------------------------------------------|----------------------|------------------------|-----------|-----------------------|---------------------------------------------------|------------------|----------------------|------------------------|-----------|---------------------------------------------------|-------------------------------|------------------|----------------------|-------------------------|-----------|-----------------------|
| upregulated co-DEGs         |                                              |                      |                        |           |                       | upregulated                                       |                  |                      |                        |           |                                                   | upregulated                   |                  |                      |                         |           |                       |
| #term ID                    | term description                             | observ ed gene count | backgr ound gene count | strengt h | false discove ry rate | #term ID                                          | term description | obser ved gene count | backgr ound gene count | strengt h | false discove ry rate                             | #term ID                      | term description | obse rved gene count | back gr ound gene count | strengt h | false discove ry rate |
| GO:0050896                  | Response to stimulus                         | 222                  | 6678                   | 0.15      | #####                 | GO:00480:Apoplast                                 | 48               | 396                  | 0.46                   | 1.59E-07  | GO:00302:Carbohydrate binding                     | 33                            | 424              | 0.35                 | 0.0062                  |           |                       |
| GO:0042221                  | Response to chemical                         | 128                  | 3176                   | 0.23      | #####                 | GO:01101:Cellular anatomical entity               | 1067             | 23375                | 0.04                   | 1.59E-07  | GO:00038:Catalytic activity                       | 524                           | ####             | 0.12                 | 4.71E-12                |           |                       |
| GO:0009628                  | Response to abiotic stimulus                 | 100                  | 1915                   | 0.34      | #####                 | GO:00055:Extracellular region                     | 160              | 1792                 | 0.33                   | 3.35E-15  | GO:00431:Cation binding                           | 253                           | 4912             | 0.17                 | 3.47E-08                |           |                       |
| GO:0100333                  | Response to organic substance                | 81                   | 2197                   | 0.19      | 0.0205                | GO:00095:Photosystem                              | 13               | 91                   | 0.53                   | 0.0216    | GO:00200:Heme binding                             | 57                            | 512              | 0.51                 | 1.40E-10                |           |                       |
| GO:0019700                  | Response to oxygen-containing compound       | 78                   | 1600                   | 0.31      | #####                 | GO:00095:Photosystem i                            | 10               | 37                   | 0.81                   | 0.0017    | GO:00055:Iron ion binding                         | 37                            | 444              | 0.38                 | 0.00072                 |           |                       |
| GO:0009719                  | Response to endogenous stimulus              | 71                   | 1696                   | 0.25      | 0.0016                | GO:00719:Cell periphery                           | 280              | 4866                 | 0.14                   | 3.93E-06  | GO:00468:Metal ion binding                        | 251                           | 4876             | 0.17                 | 3.75E-08                |           |                       |
| GO:0009725                  | Response to hormone                          | 69                   | 1638                   | 0.25      | 0.0017                | GO:00056:Cell wall                                | 58               | 692                  | 0.3                    | 0.00026   | GO:00044:Monooxygenase activity                   | 40                            | 428              | 0.43                 | 2.35E-05                |           |                       |
| GO:0009266                  | Response to temperature stimulus             | 47                   | 567                    | 0.54      | #####                 | GO:00160:Integral component of me                 | 305              | 5316                 | 0.14                   | 1.12E-06  | GO:00164:Oxidoreductase activity                  | 167                           | 2078             | 0.37                 | 1.80E-19                |           |                       |
| GO:0009416                  | Response to light stimulus                   | 41                   | 622                    | 0.45      | #####                 | GO:00312:Intrinsic component of me                | 323              | 5544                 | 0.15                   | 1.52E-07  | GO:00166:Oxidoreductase activity, acting on ch-c  | 24                            | 303              | 0.36                 | 0.0367                  |           |                       |
| GO:0010035                  | Response to inorganic substance              | 40                   | 809                    | 0.32      | 0.0063                | GO:00312:Intrinsic component of pla               | 37               | 424                  | 0.32                   | 0.0055    | GO:00167:Oxidoreductase activity, acting on pair  | 48                            | 524              | 0.42                 | 2.43E-06                |           |                       |
| GO:0009408                  | Response to heat                             | 36                   | 285                    | 0.73      | #####                 | GO:00160:Membrane                                 | 440              | 8895                 | 0.07                   | 0.0027    | GO:00166:Oxidoreductase activity, acting on the   | 23                            | 277              | 0.38                 | 0.0288                  |           |                       |
| GO:0006979                  | Response to oxidative stress                 | 36                   | 484                    | 0.5       | #####                 | GO:00058:Plasma membrane                          | 226              | 4198                 | 0.11                   | 0.0055    | GO:00046:Peroxidase activity                      | 18                            | 157              | 0.52                 | 0.0054                  |           |                       |
| GO:0006970                  | Response to osmotic stress                   | 34                   | 500                    | 0.46      | #####                 | GO:00057:Vacuole                                  | 72               | 1067                 | 0.21                   | 0.0086    | GO:00436:Protein self-association                 | 17                            | 144              | 0.53                 | 0.0059                  |           |                       |
| GO:0009651                  | Response to salt stress                      | 31                   | 405                    | 0.51      | #####                 | downregulated                                     |                  |                      |                        |           |                                                   | GO:00469:Tetrapyrrole binding | 65               | 552                  | 0.53                    | 4.87E-13  |                       |
| GO:0006457                  | Protein folding                              | 30                   | 309                    | 0.61      | #####                 | GO:00480:Apoplast                                 | 37               | 396                  | 0.43                   | 8.61E-05  | GO:00167:Transferase activity, transferring alkyl | 18                            | 176              | 0.47                 | 0.0158                  |           |                       |
| GO:0015979                  | Photosynthesis                               | 27                   | 223                    | 0.71      | #####                 | GO:01101:Cellular anatomical entity               | 885              | 23375                | 0.04                   | 6.47E-06  | GO:00469:Transition metal ion binding             | 77                            | 1420             | 0.2                  | 0.0195                  |           |                       |
| GO:0097305                  | Response to alcohol                          | 27                   | 510                    | 0.35      | 0.0384                | GO:00055:Extracellular region                     | 120              | 1792                 | 0.29                   | 2.41E-08  | GO:00055:Calmodulin binding                       | 24                            | 305              | 0.36                 | 0.0383                  |           |                       |
| GO:0003032                  | Response to reactive oxygen species          | 25                   | 209                    | 0.7       | #####                 | GO:00095:Photosystem                              | 16               | 91                   | 0.71                   | 0.00012   | GO:00168:Carbon-oxygen lyase activity, acting on  | 9                             | 55               | 0.67                 | 0.0341                  |           |                       |
| GO:0042542                  | Response to hydrogen peroxide                | 22                   | 113                    | 0.92      | #####                 | GO:00095:Photosystem i                            | 11               | 37                   | 0.93                   | 0.00011   | GO:00719:FAD binding                              | 11                            | 65               | 0.69                 | 0.0074                  |           |                       |
| GO:0019748                  | Secondary metabolic process                  | 22                   | 287                    | 0.51      | 0.0014                | GO:00095:Chloroplast                              | 103              | 2010                 | 0.17                   | 0.007     | GO:00053:Inorganic phosphate transmembrane t      | 7                             | 29               | 0.84                 | 0.0232                  |           |                       |
| GO:0051259                  | Protein complex oligomerization              | 21                   | 106                    | 0.92      | #####                 | GO:00095:Chloroplast thylakoid                    | 33               | 414                  | 0.36                   | 0.0025    | GO:00431:Ion binding                              | 371                           | 8664             | 0.09                 | 0.00049                 |           |                       |
| GO:0044550                  | Secondary metabolite biosynthetic process    | 15                   | 192                    | 0.52      | 0.0272                | GO:00095:Chloroplast thylakoid men                | 28               | 355                  | 0.36                   | 0.0086    | GO:00480:Monosaccharide binding                   | 9                             | 59               | 0.64                 | 0.0465                  |           |                       |
| GO:0019684                  | Photosynthesis, light reaction               | 12                   | 108                    | 0.67      | 0.0068                | GO:00095:Photosystem i reaction ce                | 4                | 8                    | 1.16                   | 0.0353    | GO:00166:Oxidoreductase activity, acting on perc  | 19                            | 165              | 0.52                 | 0.0034                  |           |                       |
| GO:0009642                  | Response to light intensity                  | 11                   | 97                     | 0.68      | 0.012                 | GO:00095:Photosystem ii                           | 12               | 71                   | 0.69                   | 0.0025    | GO:00198:Vitamin binding                          | 17                            | 184              | 0.43                 | 0.0465                  |           |                       |
| GO:0010345                  | Suberin biosynthetic process                 | 10                   | 33                     | 1.11      | #####                 | GO:00095:Plastid                                  | 117              | 2294                 | 0.17                   | 0.0029    | downregulated                                     |                               |                  |                      |                         |           |                       |
| GO:0048582                  | Positive regulation of post-embryonic develp | 9                    | 72                     | 0.72      | 0.0272                | GO:00095:Thylakoid                                | 37               | 460                  | 0.37                   | 0.0011    | GO:00302:Carbohydrate binding                     | 33                            | 424              | 0.27                 | 0.0445                  |           |                       |
| GO:0009765                  | Photosynthesis, light harvesting             | 8                    | 37                     | 0.96      | 0.0026                | GO:00426:Thylakoid membrane                       | 32               | 376                  | 0.39                   | 0.0014    | GO:00038:Catalytic activity                       | 608                           | ####             | 0.1                  | 2.69E-10                |           |                       |
| downregulated               |                                              |                      |                        |           |                       |                                                   |                  |                      |                        |           |                                                   | GO:00431:Cation binding       | 259              | 4912                 | 0.1                     | 0.0043    |                       |
| GO:0008152                  | Metabolic process                            | 677                  | 13896                  | 0.07      | #####                 | GO:00200:Heme binding                             | 74               | 512                  | 0.54                   | 2.11E-15  | GO:00055:Iron ion binding                         | 53                            | 444              | 0.46                 | 4.22E-08                |           |                       |
| GO:0050896                  | Response to stimulus                         | 364                  | 6678                   | 0.11      | #####                 | GO:00468:Metal ion binding                        | 258              | 4876                 | 0.1                    | 0.0039    | GO:00044:Monooxygenase activity                   | 53                            | 428              | 0.47                 | 1.62E-08                |           |                       |
| GO:0006950                  | Response to stress                           | 246                  | 3733                   | 0.2       | #####                 | GO:00164:Oxidoreductase activity                  | 190              | 2078                 | 0.34                   | 2.45E-19  | GO:00166:Oxidoreductase activity, acting on ch-c  | 32                            | 303              | 0.4                  | 0.00064                 |           |                       |
| GO:0055114                  | Oxidation-reduction process                  | 225                  | 2314                   | 0.37      | #####                 | GO:00480:Monosaccharide binding                   | 60               | 524                  | 0.44                   | 1.62E-08  | GO:00166:Oxidoreductase activity, acting on pair  | 60                            | 524              | 0.44                 | 1.62E-08                |           |                       |
| GO:0042221                  | Response to chemical                         | 223                  | 3176                   | 0.22      | #####                 | GO:00046:Peroxidase activity                      | 24               | 157                  | 0.56                   | 5.18E-05  | GO:00166:Oxidoreductase activity, acting on the   | 29                            | 277              | 0.4                  | 0.0017                  |           |                       |
| GO:0044281                  | Small molecule metabolic process             | 153                  | 2184                   | 0.22      | #####                 | GO:00436:Protein self-association                 | 21               | 144                  | 0.54                   | 0.00035   | GO:00046:Peroxidase activity                      | 24                            | 157              | 0.56                 | 5.18E-05                |           |                       |
| GO:0070887                  | Cellular response to chemical stimulus       | 138                  | 1943                   | 0.23      | #####                 | GO:00469:Tetrapyrrole binding                     | 81               | 552                  | 0.55                   | 3.30E-17  | GO:00436:Protein self-association                 | 21                            | 144              | 0.54                 | 0.00035                 |           |                       |
| GO:0050685                  | Transmembrane transport                      | 130                  | 1668                   | 0.27      | #####                 | GO:00469:Transition metal ion binding             | 96               | 1420                 | 0.21                   | 0.0007    | GO:00469:Tetrapyrrole binding                     | 81                            | 552              | 0.55                 | 3.30E-17                |           |                       |
| GO:0006952                  | Defense response                             | 123                  | 1532                   | 0.28      | #####                 | GO:00469:Transition metal ion binding             | 96               | 1420                 | 0.21                   | 0.0007    | GO:00167:Transferase activity, transferring alkyl | 25                            | 176              | 0.53                 | 9.06E-05                |           |                       |
| GO:0009605                  | Response to external stimulus                | 118                  | 1478                   | 0.28      | #####                 | GO:00228:Active ion transmembrane transporter     | 32               | 352                  | 0.34                   | 0.0068    | GO:00469:Transition metal ion binding             | 96                            | 1420             | 0.21                 | 0.0007                  |           |                       |
| GO:0043436                  | Oxoacid metabolic process                    | 117                  | 1432                   | 0.29      | #####                 | GO:00228:Active transmembrane transporter acti    | 73               | 752                  | 0.37                   | 8.13E-08  | GO:00228:Active transmembrane transporter acti    | 73                            | 752              | 0.37                 | 8.13E-08                |           |                       |
| GO:1901700                  | Response to oxygen-containing compound       | 110                  | 1600                   | 0.22      | 0.0001                | GO:00085:Anion transmembrane transporter acti     | 32               | 377                  | 0.31                   | 0.0181    | GO:00085:Anion transmembrane transporter acti     | 32                            | 377              | 0.31                 | 0.0181                  |           |                       |
| GO:0019752                  | Carboxylic acid metabolic process            | 106                  | 1318                   | 0.28      | #####                 | GO:00162:Antioxidant activity                     | 26               | 200                  | 0.49                   | 0.00018   | GO:00162:Antioxidant activity                     | 26                            | 200              | 0.49                 | 0.00018                 |           |                       |
| GO:0009607                  | Response to biotic stimulus                  | 102                  | 1076                   | 0.36      | #####                 | GO:00152:Antipporter activity                     | 24               | 251                  | 0.36                   | 0.0205    | GO:00152:Antipporter activity                     | 24                            | 251              | 0.36                 | 0.0205                  |           |                       |
| GO:0044119                  | Interspecies interaction between organisms   | 99                   | 1146                   | 0.31      | #####                 | GO:00426:ATPase-coupled transmembrane trans       | 22               | 224                  | 0.37                   | 0.0237    | GO:00426:ATPase-coupled transmembrane trans       | 22                            | 224              | 0.37                 | 0.0237                  |           |                       |
| GO:0006811                  | Ion transport                                | 95                   | 1288                   | 0.25      | #####                 | GO:00151:Carbohydrate transmembrane transpo       | 14               | 97                   | 0.54                   | 0.011     | GO:00151:Carbohydrate transmembrane transpo       | 14                            | 97               | 0.54                 | 0.011                   |           |                       |
| GO:0051707                  | Response to other organism                   | 94                   | 1031                   | 0.34      | #####                 | GO:00053:Carbohydrate:proton symporter activity   | 10               | 55                   | 0.64                   | 0.018     | GO:00053:Carbohydrate:proton symporter activity   | 10                            | 55               | 0.64                 | 0.018                   |           |                       |
| GO:0005975                  | Carbohydrate metabolic process               | 92                   | 1418                   | 0.19      | 0.0045                | GO:00800:Chitin binding                           | 7                | 29                   | 0.76                   | 0.0277    | GO:00800:Chitin binding                           | 7                             | 29               | 0.76                 | 0.0277                  |           |                       |
| GO:0098542                  | Defense response to other organism           | 77                   | 801                    | 0.36      | #####                 | GO:00045:Chitinase activity                       | 9                | 43                   | 0.7                    | 0.015     | GO:00045:Chitinase activity                       | 9                             | 43               | 0.7                  | 0.015                   |           |                       |
| GO:0034220                  | Ion transmembrane transport                  | 74                   | 996                    | 0.25      | 0.0006                | GO:00512:Dioxygenase activity                     | 25               | 262                  | 0.36                   | 0.018     | GO:00512:Dioxygenase activity                     | 25                            | 262              | 0.36                 | 0.018                   |           |                       |
| GO:0044283                  | Small molecule biosynthetic process          | 72                   | 973                    | 0.25      | 0.0009                | GO:00037:DNA-binding transcription factor activit | 109              | 1705                 | 0.19                   | 0.0015    | GO:00037:DNA-binding transcription factor activit | 109                           | 1705             | 0.19                 | 0.0015                  |           |                       |
| GO:1901135                  | Carbohydrate derivative metabolic process    | 64                   | 997                    | 0.19      | 0.0463                | GO:00465:Glucosyltransferase activity             | 31               | 262                  | 0.45                   | 0.00012   | GO:00465:Glucosyltransferase activity             | 31                            | 262              | 0.45                 | 0.00012                 |           |                       |
| GO:0010035                  | Response to inorganic substance              | 62                   | 809                    | 0.26      | 0.0013                | GO:00043:Glutathione transferase activity         | 18               | 67                   | 0.81                   | 1.50E-06  | GO:00043:Glutathione transferase activity         | 18                            | 67               | 0.81                 | 1.50E-06                |           |                       |
| GO:0046394                  | Carboxylic acid biosynthetic process         | 61                   | 716                    | 0.31      | 0.0001                | GO:00167:Hydrolase activity, acting on glycosyl t | 45               | 630                  | 0.23                   | 0.0347    | GO:00167:Hydrolase activity, acting on glycosyl t | 45                            | 630              | 0.23                 | 0.0347                  |           |                       |
| GO:0071554                  | Cell wall organization or biogenesis         | 58                   | 819                    | 0.23      | 0.0117                | GO:00045:Hydrolase activity, hydrolyzing o-glyco  | 15               | 124                  | 0.46                   | 0.0274    | GO:00045:Hydrolase activity, hydrolyzing o-glyco  | 15                            | 124              | 0.46                 | 0.0274                  |           |                       |
| GO:0006820                  | Anion transport                              | 53                   | 520                    | 0.39      | #####                 | GO:00151:Inorganic anion transmembrane trans      | 63               | 947                  | 0.2                    | 0.0234    | GO:00151:Inorganic anion transmembrane trans      | 63                            | 947              | 0.2                  | 0.0234                  |           |                       |
| GO:0032787                  | Monocarboxylic acid metabolic process        | 51                   | 692                    | 0.25      | 0.0117                | GO:00301:Manganese ion binding                    | 11               | 76                   | 0.54                   | 0.0358    | GO:00301:Manganese ion binding                    | 11                            | 76               | 0.54                 | 0.0358                  |           |                       |
| GO:0045229                  | External encapsulating structure organizatio | 50                   | 704                    | 0.23      | 0.0243                | GO:00167:Oxidoreductase activity, acting on pair  | 23               | 204                  | 0.43                   | 0.004     | GO:00167:Oxidoreductase activity, acting on pair  | 23                            | 204              | 0.43                 | 0.004                   |           |                       |
| GO:0071555                  | Cell wall organization                       | 48                   | 679                    | 0.23      | 0.0331                | GO:00800:Quercetin 3-o-glucosyltransferase acti   | 10               | 62                   | 0.59                   | 0.0312    | GO:00800:Quercetin 3-o-glucosyltransferase acti   | 10                            | 62               | 0.59                 | 0.0312                  |           |                       |
| GO:0005976                  | Polysaccharide metabolic process             | 45                   | 588                    | 0.26      | 0.0124                | GO:00800:Quercetin 7-o-glucosyltransferase acti   | 10               | 61                   | 0.59                   | 0.0284    | GO:00800:Quercetin 7-o-glucosyltransferase acti   | 10                            | 61               | 0.59                 | 0.0284                  |           |                       |
| GO:0098656                  | Anion transmembrane transport                | 44                   | 383                    | 0.44      | #####                 | GO:00152:Secondary active transmembrane tran      | 50               | 487                  | 0.39                   | 7.48E-06  | GO:00152:Secondary active transmembrane tran      | 50                            | 487              | 0.39                 | 7.48E-06                |           |                       |
| GO:0006520                  | Cellular amino acid metabolic process        | 44                   | 493                    | 0.33      | 0.0009                | GO:00152:Solute:cation symporter activity         | 16               | 143                  | 0.43                   | 0.0352    | GO:00152:Solute:cation symporter activity         | 16                            | 143              | 0.43                 | 0.0352                  |           |                       |
| GO:0006790                  | Sulfur compound metabolic process            | 43                   | 379                    | 0.43      | #####                 | GO:00465:Glucosyltransferase activity             | 31               | 262                  | 0.45                   | 0.00012   | GO:00465:Glucosyltransferase activity             | 31                            | 262              | 0.45                 | 0.00012                 |           |                       |
| GO:0006979                  | Response to oxidative stress                 | 41                   | 484                    | 0.31      | 0.0043                | GO:00043:Glutathione transferase activity         | 18               | 67                   | 0.81                   | 1.50E-06  | GO:00043:Glutathione transferase activity         | 18                            | 67               | 0.81                 | 1.50E-06                |           |                       |
| GO:0009723                  | Response to ethylene                         | 39                   | 343                    | 0.43      | #####                 | GO:01401:Transcription regulator activity         | 111              | 1862                 | 0.15                   | 0.0181    | GO:01401:Transcription regulator activity         | 111                           | 1862             | 0.15                 | 0.0181                  |           |                       |
| GO:0016052                  | Carbohydrate catabolic process               | 38                   | 409                    | 0.35      | 0.0015                | GO:00167:Transferase activity, transferring glyco | 65               | 756                  | 0.31                   | 3.25E-05  | GO:00167:Transferase activity, transferring glyco | 65                            | 756              | 0.31                 | 3.25E-05                |           |                       |
| GO:1901605                  | Alpha-amino acid metabolic process           | 37                   | 368                    | 0.38      | 0.0005                | GO:00167:Transferase activity, transferring hexo  | 46               | 474                  | 0.37                   | 9.06E-05  | GO:00167:Transferase activity, transferring hexo  | 46                            | 474              | 0.37                 | 9.06E-05                |           |                       |
| GO:0071369                  | Cellular response to ethylene stimulus       | 35                   | 278                    | 0.48      | #####                 | GO:00228:Transmembrane transporter activity       | 123              | 1619                 | 0.26                   | 1.87E-07  | GO:00228:Transmembrane transporter activity       | 123                           | 1619             | 0.26                 | 1.87E-07                |           |                       |
| GO:0009636                  | Response to toxic substance                  | 35                   | 294                    | 0.45      | #####                 | GO:00052:Transporter activity                     | 125              | 1726                 | 0.24                   | 1.59E-06  | GO:00052:Transporter activity                     | 125                           | 1726             | 0.24                 | 1.59E-06                |           |                       |
| GO:0009620                  | Response to fungus                           | 34                   | 329                    | 0.39      | 0.0007                | GO:00352:UDP-glucosyltransferase activity         | 25               | 213                  | 0.45                   | 0.0012    | GO:00352:UDP-glucosyltransferase activity         | 25                            | 213              | 0.45                 | 0.0012                  |           |                       |
| GO:0009873                  | Ethylene-activated signaling pathway         | 33                   | 271                    | 0.46      | #####                 | GO:00081:UDP-glucosyltransferase activity         | 41               | 403                  | 0.39                   | 0.0001    | GO:00081:UDP-glucosyltransferase activity         | 41                            | 403              | 0.39                 | 0.0001                  |           |                       |
| GO:0019748                  | Secondary metabolic process                  | 33                   | 287                    | 0.44      | 0.0001                | GO:00429:Xenobiotic transmembrane transporter     | 15               | 98                   | 0.56                   | 0.004     | GO:00429:Xenobiotic transmembrane transporter     | 15                            | 98</             |                      |                         |           |                       |

|            |                                             |    |    |      |        |
|------------|---------------------------------------------|----|----|------|--------|
| GO:0009251 | Glucan catabolic process                    | 10 | 58 | 0.62 | 0.0226 |
| GO:0044247 | Cellular polysaccharide catabolic process   | 9  | 49 | 0.64 | 0.0276 |
| GO:0030245 | Cellulose catabolic process                 | 8  | 27 | 0.85 | 0.0053 |
| GO:0006568 | Tryptophan metabolic process                | 8  | 30 | 0.8  | 0.0088 |
| GO:0080029 | Cellular response to boron-containing subst | 7  | 12 | 1.14 | 0.0008 |
| GO:0019288 | Isopentenyl diphosphate biosynthetic proces | 7  | 14 | 1.08 | 0.0014 |
| GO:0071281 | Cellular response to iron ion               | 7  | 18 | 0.97 | 0.0043 |
| GO:0016137 | Glycoside metabolic process                 | 7  | 33 | 0.71 | 0.0495 |
| GO:0006949 | Syncytium formation                         | 6  | 13 | 1.04 | 0.0062 |
| GO:0000162 | Tryptophan biosynthetic process             | 6  | 18 | 0.9  | 0.0192 |
| GO:1901806 | Beta-glucoside biosynthetic process         | 6  | 22 | 0.81 | 0.0408 |
| GO:0019756 | Cyanogenic glycoside biosynthetic process   | 6  | 23 | 0.79 | 0.047  |
| GO:0010055 | Atrichoblast differentiation                | 5  | 5  | 1.38 | 0.0024 |
| GO:0080169 | Cellular response to boron-containing subst | 5  | 5  | 1.38 | 0.0024 |
| GO:0032107 | Regulation of response to nutrient levels   | 5  | 10 | 1.08 | 0.0151 |
