# Supplementary material for: Comparative Transcriptome Profiling of Cassava Tuberous Roots in Response to Postharvest Physiological Deterioration
Source: MDPI journal article supplement (doi:10.3390/ijms24010246), 2022-12-23
Supplement: s1 [file s1]

Table S1 Classification of data of different samples.

| Sample   | Total Raw Reads<br>(bp) | Total Clean<br>Reads(bp) | Total Clean<br>Reads(Gb) | Q20(%) | Q30(%) | Clean Reads Ratio<br>(%) | Total Clean Reads<br>Num | Total reads<br>without rRNA | Total Mapping (%) | Uniquely Mapping<br>(%) |
|----------|-------------------------|--------------------------|--------------------------|--------|--------|--------------------------|--------------------------|-----------------------------|-------------------|-------------------------|
| F-SC8-1  | 3,194,578,500           | 3,163,875,500            | 3.16                     | 95.72% | 91.57% | 99.04%                   | 25,311,004               | 24,271,212                  | 81.63%            | 81.42%                  |
| F-SC8-2  | 3,085,361,750           | 3,054,025,250            | 3.05                     | 95.39% | 90.88% | 98.98%                   | 24,432,202               | 19,621,306                  | 77.75%            | 77.56%                  |
| S-SC8-1  | 3,179,155,750           | 3,146,779,250            | 3.15                     | 95.44% | 91.09% | 98.98%                   | 25,174,234               | 23,688,878                  | 80.22%            | 79.94%                  |
| S-SC8-2  | 2,984,153,000           | 2,952,679,750            | 2.95                     | 95.37% | 90.94% | 98.95%                   | 23,621,438               | 23,135,938                  | 73.92%            | 73.57%                  |
| F-RYG1-1 | 2,829,267,000           | 2,796,811,500            | 2.80                     | 95.43% | 91.06% | 98.85%                   | 22,374,492               | 21,927,792                  | 77.74%            | 77.53%                  |
| F-RYG1-2 | 3,032,646,000           | 3,004,534,750            | 3.00                     | 95.60% | 91.25% | 99.07%                   | 24,036,278               | 18,478,534                  | 76.50%            | 76.33%                  |
| S-RYG1-1 | 2,805,897,500           | 2,774,660,250            | 2.77                     | 95.29% | 90.79% | 98.89%                   | 22,197,282               | 20,480,816                  | 82.02%            | 81.77%                  |
| S-RYG1-2 | 2,805,081,250           | 2,778,187,250            | 2.78                     | 95.63% | 91.44% | 99.04%                   | 22,225,498               | 21,560,704                  | 84.07%            | 83.73%                  |
