# Supplementary material for: Comparative Transcriptome Profiling of Cassava Tuberous Roots in Response to Postharvest Physiological Deterioration
Source: MDPI journal article supplement (doi:10.3390/ijms24010246), 2022-12-23
Supplement: s1 [file s1]

(a)

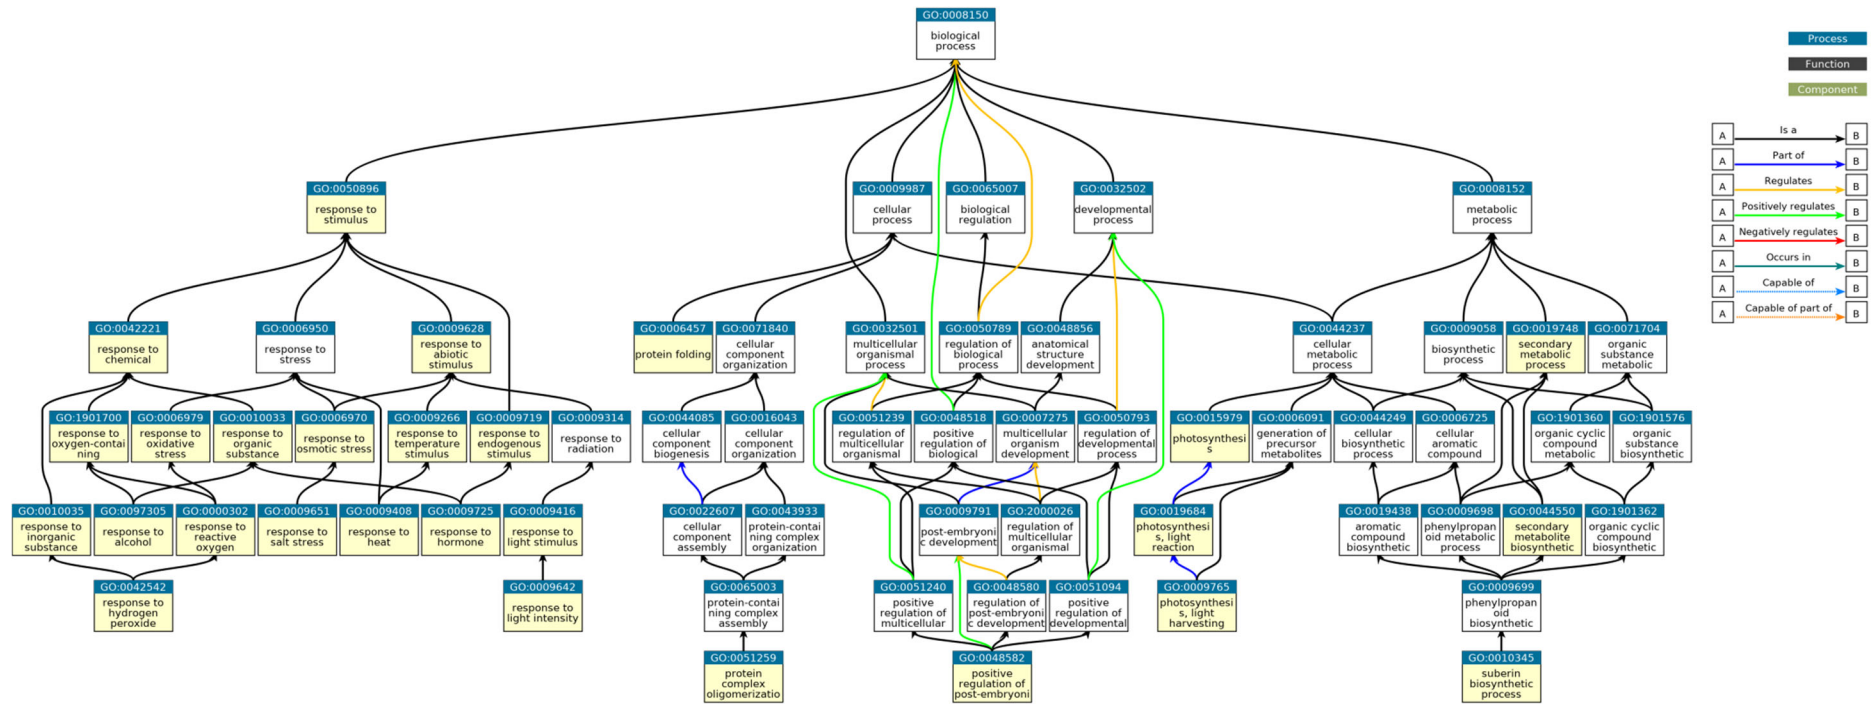

(b)

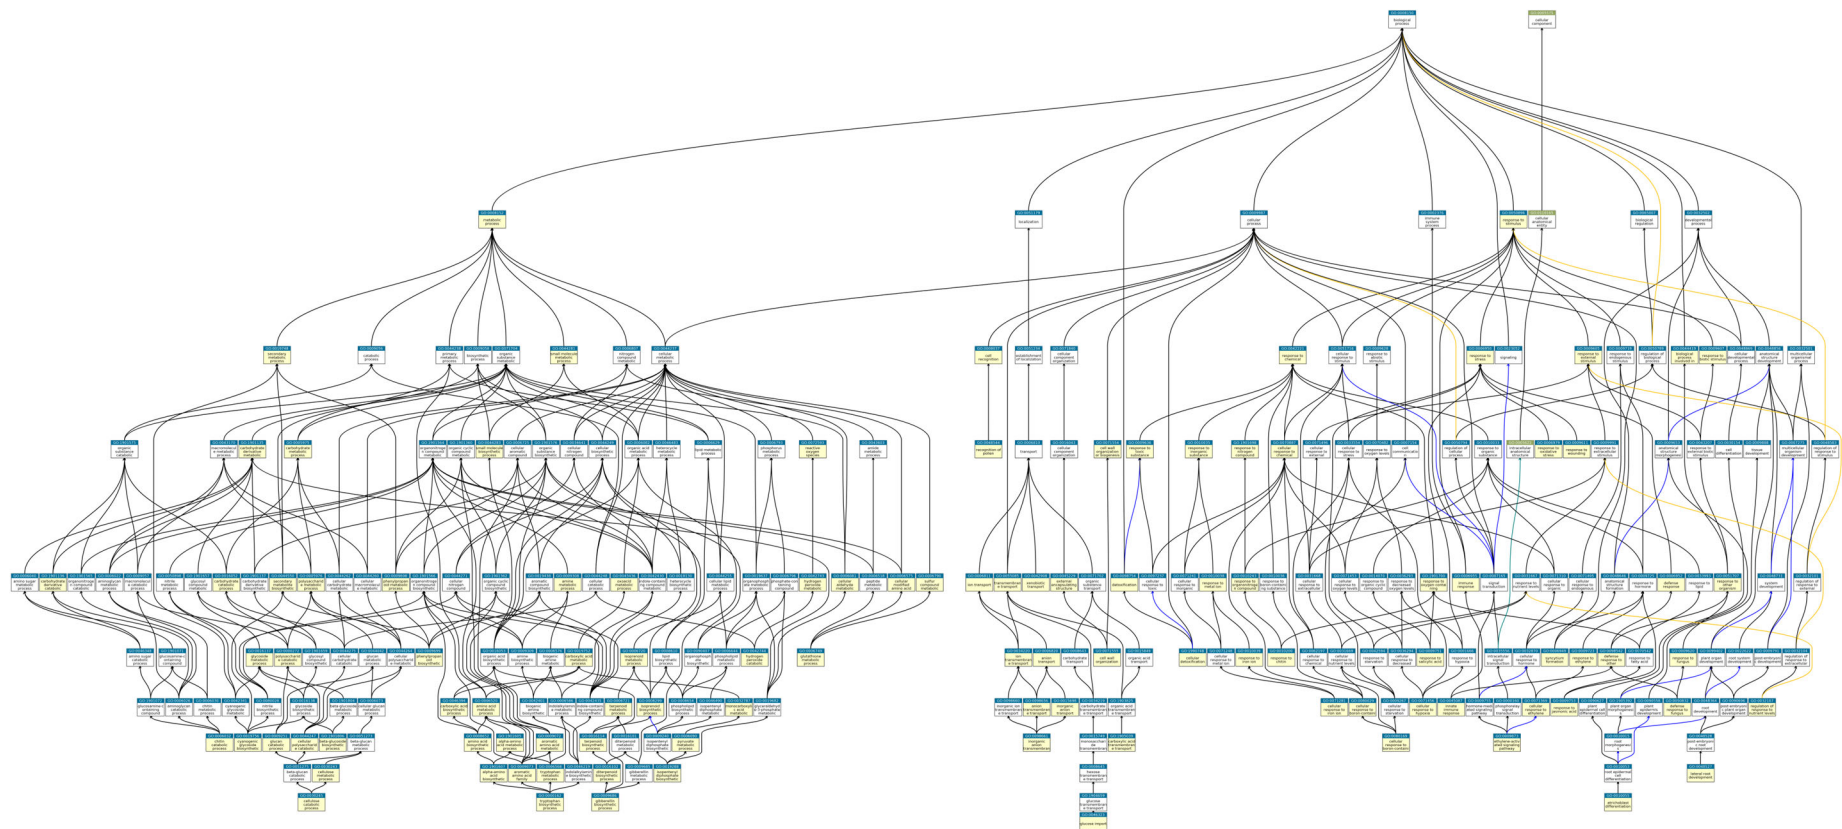

**Figure S1.** GO enrichment analysis of upregulated (a) and downregulated(b) co-DEGs in biological process terms

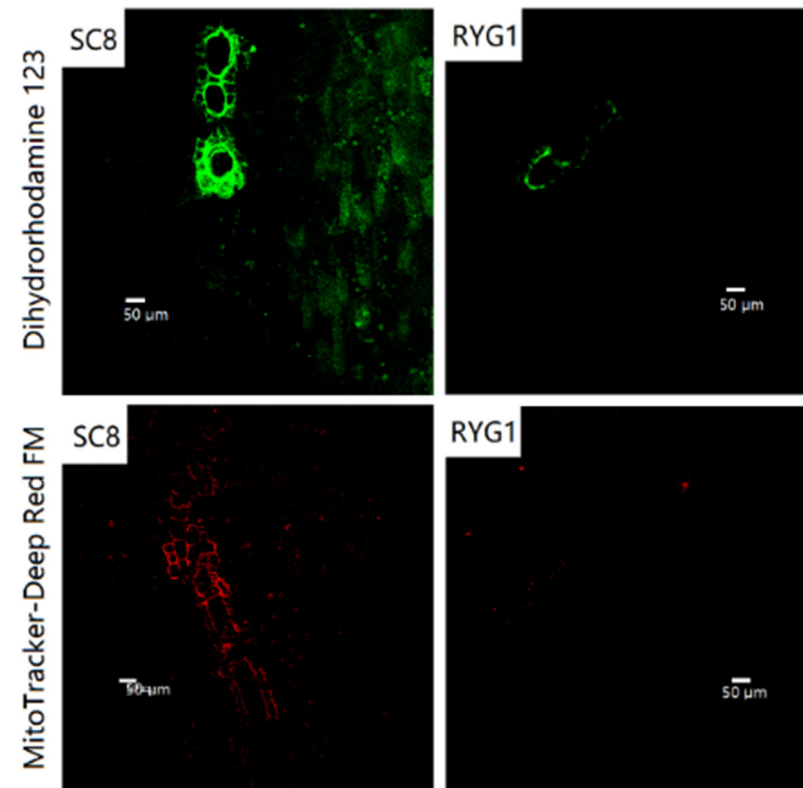

**Figure S2.** Fluorescence observation results showing reactive oxygen species production after 21-day- storage in RYG1 and SC8.

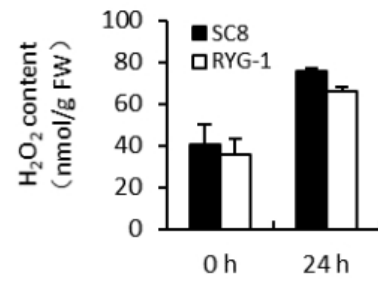

**Figure S3.** H<sub>2</sub>O<sub>2</sub> content in 21-day-storage RYG1 and SC8 cassava.

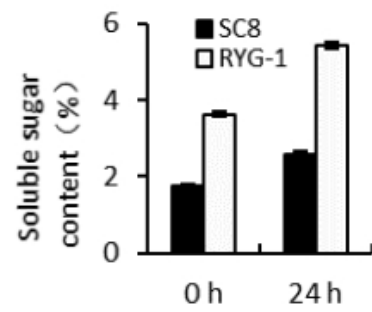

**Figure S4.** Soluble sugar content in 21-day-storage RYG1 and SC8 cassava.
