# Supplementary material for: Comparative Transcriptome Profiling of Cassava Tuberous Roots in Response to Postharvest Physiological Deterioration
Source: MDPI journal article supplement (doi:10.3390/ijms24010246), 2022-12-23
Supplement: s1 [file s1]

**Table S3** Differentially expressed genes in plant hormone signal transduction

| <b>ID</b> | <b>SS vs FS</b> | <b>SR vs SS</b> | <b>SR vs FR</b> | <b>Description</b> |
|-----------|-----------------|-----------------|-----------------|--------------------|
| 02408m    | -4.32           | 3.94            |                 | ARFs               |
| 02762m    | -3.29           | 2.42            |                 | ARFs               |
| 02885m    | -3.22           | 2.06            |                 | ARFs               |
| 02953m    | -2.54           | 2.76            |                 | ARR-B              |
| 12135m    | -2.04           | 4.17            | 2.09            | AUX/IAAs           |
| 12530m    | -4.36           | 4.42            |                 | AUX/IAAs           |
| 12706m    |                 | 3.18            | 2.88            | AUX/IAAs           |
| 14431m    |                 | 5.21            | 14.49           | AUX/IAAs           |
| 14900m    | -6.10           | 2.37            | -3.31           | AUX/IAAs           |
| 15577m    | 10.50           | 3.61            | 14.11           | AUX/IAAs           |
| 21897m    |                 | 10.57           | 10.57           | AUX/IAAs           |
| 06788m    | 4.29            | -3.94           |                 | AUX1               |
| 12164m    | 3.92            | -2.38           |                 | BKI1               |
| 06280m    |                 | -2.12           | -2.56           | BSK                |
| 09919m    | -6.77           | 3.51            | -3.30           | CYCD3              |
| 28677m    | -6.00           | 4.94            |                 | DELLA              |
|           |                 |                 |                 | EIN2               |
| 15566m    | 3.96            | -5.43           |                 | ERFs               |
| 15673m    |                 | -2.65           | -2.71           | ERFs               |
| 15691m    | 10.91           | -10.91          |                 | ERFs               |
| 15856m    | 3.02            | -5.70           | -2.40           | ERFs               |
| 22781m    | 3.68            | -5.55           | -2.85           | ERFs               |
| 02375m    | 2.80            | -2.33           |                 | ETR                |
| 03838m    | -3.13           | 2.74            |                 | GH3s               |
| 04078m    | -2.96           | -4.30           | -7.72           | GH3s               |
| 04196m    | -8.64           | 8.78            |                 | GH3s               |
| 04899m    |                 | -2.41           | -4.48           | JAR1               |
| 16821m    |                 | -4.67           | -6.27           | JAZs               |
| 17020m    | -2.53           | -3.58           | -6.06           | JAZs               |
| 07913m    |                 | 2.33            | 3.83            | PP2C               |
| 13309m    |                 | 2.53            | 3.00            | PP2C               |
| 31181m    | 2.55            | -10.39          |                 | PP2C               |
| 15315m    |                 | -6.31           | -4.68           | PYLs               |
| 16054m    |                 | -5.04           | -7.36           | PYLs               |
| 17683m    | 2.07            | -2.27           |                 | SAURs              |
| 20041m    |                 | -4.23           | -2.75           | SAURs              |
| 21479m    |                 | 14.75           | 4.58            | SAURs              |
| 22896m    | 5.27            | -5.25           |                 | TGA                |
| 13286m    | -2.29           | -2.52           | -5.10           | XET                |
