# Supplementary material for: Comparative Transcriptome Profiling of Cassava Tuberous Roots in Response to Postharvest Physiological Deterioration
Source: MDPI journal article supplement (doi:10.3390/ijms24010246), 2022-12-23
Supplement: s1 [file s1]

**Table S5. The list of primers used in the study**

| Gene ID              | Primer F               | Primer R               |
|----------------------|------------------------|------------------------|
| cassava4.1_003934m.g | ACATCCTTTGAAAAGTGAACCG | TTTCAGCTTCTGGCAGTTAAAC |
| cassava4.1_005092m.g | ACTGCTTATGAAAGGTCAAGGA | ACCAGCGTAGTATCGAAATAGG |
| cassava4.1_005418m.g | GTTGTTAATCGACGAAGATGCA | GCAGAAATAACCTCAACGGATC |
| cassava4.1_006013m.g | GAGACAACTGAAGAAGCTTTGG | CGAGAAGCAAGAACTGAAACA  |
| cassava4.1_007957m.g | CATTGAATGTGGCTAAACCGAA | CAAACCTTCTGGCTTCTTCGAA |
| cassava4.1_010967m.g | CGTTTGCGCGCTTATATAGTAA | TCCAGAGTTGTGAAGATGTTGA |
| cassava4.1_012097m.g | ATCAAAAGCTATGGCGGATTTC | AGATCAAAGTGTTGCTACAGA  |
| cassava4.1_014454m.g | ATGAGTTTGTTGGGGATAAGGT | GCAACAACCTCCATGGTAGATC |
| Tubulin              | GTGGAGGAACTGGTTCTGGA   | TGCACTCATCTGCATTCTCC   |
