# Supplementary material for: Comparative Transcriptome Profiling of Cassava Tuberous Roots in Response to Postharvest Physiological Deterioration
Source: MDPI journal article supplement (doi:10.3390/ijms24010246), 2022-12-23
Supplement: s1 [file s1]

**Table S4 co-DEGs in the GO term of response to reactive oxygen species**

| id              | SS vs FS | SR vs SS | SR vs FR | Description                           |
|-----------------|----------|----------|----------|---------------------------------------|
| cassava4 18158m | -3.21    | 2.46     |          | 17.6 kDa class II heat shock protein  |
| cassava4 02195m | 2.57     | 2.23     | 3.81     | ABC2 homolog 13                       |
| cassava4 12494m |          | -8.18    | -5.57    | ACC oxidase 1                         |
| cassava4 24509m |          | 11.60    | 4.19     | ascorbate peroxidase 2                |
| cassava4 03515m | 5.71     | -3.26    |          | ATP-binding cassette 14               |
| cassava4 04899m |          | -2.41    | -4.48    | Auxin-responsive GH3 family protein   |
| cassava4 10580m |          | -2.84    | -3.59    | BTB and TAZ domain protein 1          |
| cassava4 06297m |          | 9.47     | 9.47     | catalase 2                            |
| cassava4 15578m | 2.38     | -2.87    |          | copper/zinc superoxide dismutase 2    |
| cassava4 16548m | -2.86    | 3.72     |          | HSP20-like chaperones superfamily prc |
| cassava4 17871m | -3.42    | 4.14     |          | HSP20-like chaperones superfamily prc |
| cassava4 17974m |          | 2.93     | 2.61     | HSP20-like chaperones superfamily prc |
| cassava4 18038m | -4.00    | 4.13     |          | HSP20-like chaperones superfamily prc |
| cassava4 18093m | 2.36     | 3.30     | 6.82     | HSP20-like chaperones superfamily prc |
| cassava4 18131m | -2.22    | 4.38     | 2.03     | HSP20-like chaperones superfamily prc |
| cassava4 18200m |          | 3.51     | 3.87     | HSP20-like chaperones superfamily prc |
| cassava4 19659m | -2.01    | 2.26     |          | HSP20-like chaperones superfamily prc |
| cassava4 21306m |          | 11.63    | 11.63    | HSP20-like chaperones superfamily prc |
| cassava4 22774m | -11.65   | 11.63    |          | HSP20-like chaperones superfamily prc |
| cassava4 22909m | -2.16    | 2.39     |          | HSP20-like chaperones superfamily prc |
| cassava4 24326m | -4.50    | 8.95     | 4.14     | HSP20-like chaperones superfamily prc |
| cassava4 25159m |          | 4.98     | 6.23     | HSP20-like chaperones superfamily prc |
| cassava4 26342m | -2.79    | 7.18     | 3.58     | HSP20-like chaperones superfamily prc |
| cassava4 28591m | -3.88    | 4.30     |          | HSP20-like chaperones superfamily prc |
| cassava4 28846m | -2.26    | 3.95     |          | HSP20-like chaperones superfamily prc |
| cassava4 32436m |          | 3.70     | 3.55     | HSP20-like chaperones superfamily prc |
| cassava4 33525m | -2.93    | 5.95     | 2.52     | HSP20-like chaperones superfamily prc |
| cassava4 01966m |          | -3.87    | -5.77    | mechanosensitive channel of small con |
| cassava4 03178m |          | 2.07     | 2.09     | Protein of unknown function (DUF3506) |
| cassava4 21761m |          | -3.91    | -2.21    | senescence associated gene 20         |
| cassava4 17157m |          | 2.70     | 2.03     | temperature-induced lipocalin         |
| cassava4 22886m | -4.62    | 3.87     |          | UDP-Glycosyltransferase superfamily p |

stein  
ductance-like 10  
)

rotein
